# Supplementary material
Source: PubMed Central journal article supplement (PMC5911428)
Supplement: NIHMS930989-supplement.pdf [file NIHMS930989-supplement.pdf]

## Supplementary Online Contents

**Supplemental Table 1.** Baseline patient characteristics in overall and stratified by biologic use in the overall cohort

**Supplemental Table 2.** Types of initial biologics and number of patients treated with each biologic agent in the overall cohort ( $n = 4,617$ )

**Supplemental Table 3.** Predictive equation for the probability of biologic use

**Supplemental Table 4.** Association of biologic treatment with incident CKD (decrease in eGFR [A]  $<60$  and [B]  $<45$  mL/min/1.73m<sup>2</sup>) in the overall cohort

**Supplemental Table 5.** Association of biologic treatment with change in eGFR in the overall cohort

**Supplemental Table 6.** ICD-9 and procedure (CPT) codes used to define prevalent comorbid conditions

**Supplemental Table 7.** Area-based socio-economic indicators

**Supplemental Figure 1.** Kaplan-Meier curve for initiation of biologics in the overall cohort

**Supplemental Figure 2.** Change in eGFR slopes before and after biologic administration in patients treated with biologics in the overall cohort

**Supplemental Figure 3.** Change in eGFR slopes (mean, SD) before and after biologic administration in patients treated with (A) TNF- $\alpha$  inhibitors and (B) non-TNF biologics in the overall cohort

**Supplemental Figure 4.** Algorithm used to define study cohort

**Supplemental Table 1. Baseline patient characteristics in overall and stratified by biologic use in the overall cohort**

| Characteristics                           | Overall<br>( <i>n</i> = 20,757) | Biologic use               |                            |
|-------------------------------------------|---------------------------------|----------------------------|----------------------------|
|                                           |                                 | No<br>( <i>n</i> = 16,140) | Yes<br>( <i>n</i> = 4,617) |
| Mean age (SD), y                          | 63.2 (11.4)                     | 64.8 (11.2)                | 57.6 (9.9)                 |
| Mean eGFR (SD), mL/min/1.73m <sup>2</sup> | 83.4 (14.8)                     | 82.1 (14.4)                | 87.6 (15.4)                |
| Male, <i>n</i> (%)                        | 19,044 (91.7)                   | 14,925 (92.5)              | 4,119 (89.2)               |
| African American, <i>n</i> (%)            | 2,503 (12.1)                    | 2,008 (12.4)               | 495 (10.7)                 |
| Hypertension, <i>n</i> (%)                | 13,289 (64.0)                   | 10,687 (66.2)              | 2,602 (56.4)               |
| Diabetes mellitus, <i>n</i> (%)           | 4,766 (23.0)                    | 3,897 (24.1)               | 869 (18.8)                 |
| Coronary heart disease, <i>n</i> (%)      | 3,049 (14.7)                    | 2,557 (15.8)               | 492 (10.7)                 |
| Congestive heart failure, <i>n</i> (%)    | 1,407 (6.8)                     | 1,262 (7.8)                | 145 (3.1)                  |
| Cerebrovascular disease, <i>n</i> (%)     | 1,526 (7.4)                     | 1,312 (8.1)                | 214 (4.6)                  |
| Peripheral arterial disease, <i>n</i> (%) | 1,672 (8.1)                     | 1,427 (8.8)                | 245 (5.3)                  |
| Chronic lung disease, <i>n</i> (%)        | 5,671 (27.3)                    | 4,662 (28.9)               | 1,009 (21.9)               |
| Dementia, <i>n</i> (%)                    | 166 (0.8)                       | 159 (1.0)                  | 7 (0.2)                    |
| Liver disease, <i>n</i> (%)               | 248 (1.2)                       | 205 (1.3)                  | 43 (0.9)                   |
| Malignancies, <i>n</i> (%)                | 2,525 (12.2)                    | 2,199 (13.6)               | 326 (7.1)                  |
| HIV/AIDS, <i>n</i> (%)                    | 36 (0.2)                        | 31 (0.2)                   | 5 (0.1)                    |
| Depression, <i>n</i> (%)                  | 1,886 (9.1)                     | 1,429 (8.9)                | 457 (9.9)                  |
| Married, <i>n</i> (%)                     | 12,515 (60.3)                   | 9,781 (60.6)               | 2,734 (59.2)               |

|                                                              |                      |                      |                       |
|--------------------------------------------------------------|----------------------|----------------------|-----------------------|
| Service connected, <i>n</i> (%)                              | 9,021 (43.5)         | 6,775 (42.0)         | 2,246 (48.6)          |
| Median per capita income (IQI), \$                           | 24,131 (12704-34889) | 23,997 (12550-35007) | 24,840 (131616-34214) |
| Living in area with high housing stress, <i>n</i> (%)        | 6,258 (30.1)         | 4,778 (29.6)         | 1,480 (32.1)          |
| Living in area with low education, <i>n</i> (%)              | 2,238 (10.8)         | 1,732 (10.7)         | 506 (11.0)            |
| Living in area with low employment, <i>n</i> (%)             | 2,055 (9.9)          | 1,610 (10.0)         | 445 (9.6)             |
| Living in area of persistent poverty, <i>n</i> (%)           | 1,110 (5.3)          | 870 (5.4)            | 240 (5.2)             |
| Mean BMI (SD), <i>kg/m</i> <sup>2</sup>                      | 28.5 (5.5)           | 28.4 (5.5)           | 29.1 (5.5)            |
| Mean systolic BP (SD), <i>mmHg</i>                           | 134.6 (18.6)         | 134.9 (18.9)         | 133.4 (17.5)          |
| Mean diastolic BP (SD), <i>mmHg</i>                          | 75.9 (11.3)          | 75.5 (11.5)          | 77.3 (10.6)           |
| Mean serum albumin (SD), <i>g/dL</i>                         | 3.9 (0.4)            | 3.9 (0.5)            | 4.0 (0.4)             |
| Mean articular procedures (SD), <i>n</i> ( <i>per year</i> ) | 0.1 (0.4)            | 0.1 (0.4)            | 0.2 (0.4)             |
| RASi use, <i>n</i> (%)                                       | 8,503 (41.0)         | 6,887 (42.7)         | 1,616 (35.0)          |
| Statin use, <i>n</i> (%)                                     | 6,331 (30.5)         | 5,116 (31.7)         | 1,215 (26.3)          |
| Methotrexate use, <i>n</i> (%)                               | 7,672 (37.0)         | 5,389 (33.4)         | 2,283 (49.4)          |
| Hydroxychloroquine use, <i>n</i> (%)                         | 6,032 (29.1)         | 4,637 (28.7)         | 1,395 (30.2)          |
| Sulfasalazine use, <i>n</i> (%)                              | 3,071 (14.8)         | 2,147 (13.3)         | 924 (20.0)            |
| Other non-biologic DMARD use, <i>n</i> (%)                   | 585 (2.8)            | 406 (2.5)            | 179 (3.9)             |
| NSAID use, <i>n</i> (%)                                      | 11,413 (55.0)        | 8,539 (52.9)         | 2,874 (62.2)          |
| Glucocorticoid use, <i>n</i> (%)                             | 8,517 (41.0)         | 6,122 (37.9)         | 2,395 (51.9)          |

*Note:* Data are presented as number (percentage), mean (standard deviation), or median (interquartile interval). All *P*-values except liver disease (*P* = 0.06), HIV/AIDS (*P* = 0.23), low education (*P* = 0.66), low employment (*P* = 0.50), and persistent poverty (*P* = 0.61) for comparing differences between with and without biologic exposure were statistically significant.

Abbreviations: AIDS = acquired immunodeficiency syndrome; BMI = body mass index; BP = blood pressure; DMARD = disease-modifying anti-rheumatic drug; eGFR = estimated glomerular filtration rate; HIV = human immunodeficiency virus; NSAID = nonsteroidal anti-inflammatory drug; RASi = renin-angiotensin system inhibitor.

**Supplemental Table 2. Types of initial biologics and number of patients treated with each biologic agent in the overall cohort (*n* = 4,617)**

| <b>Type</b>  | <b>Number</b> | <b>%</b> |
|--------------|---------------|----------|
| Etanercept   | 2,779         | 60.2     |
| Adalimumab   | 990           | 21.4     |
| Infliximab   | 441           | 9.6      |
| Abatacept    | 189           | 4.1      |
| Rituximab    | 160           | 3.5      |
| Golimumab    | 25            | 0.5      |
| Certolizumab | 15            | 0.3      |
| Anakinra     | 15            | 0.3      |
| Tocilizumab  | 3             | 0.1      |

**Supplemental Table 3. Predictive equation for the probability of biologic use**

The multivariate logistic regression model underlying the odds ratios for biologic use in Table 2 has the following predictive equation:

$$\text{Probability for biologic use} = \exp(a)/(1 + \exp[a])$$

$$a = 0.5969 - 0.0530 \times \text{age} - 0.1850 \times I_{\text{female}} - 0.6024 \times I_{\text{African American}} + 0.0077 \times \text{eGFR} - 0.1785 \times I_{\text{diabetes}} - 0.1139 \times I_{\text{hypertension}} - 0.1481 \times I_{\text{coronary heart disease}} - 0.5425 \times I_{\text{congestive heart failure}} - 0.1687 \times I_{\text{cerebrovascular disease}} - 0.2668 \times I_{\text{peripheral vascular disease}} - 0.2580 \times I_{\text{chronic lung disease}} - 0.2405 \times I_{\text{liver disease}} - 1.1010 \times I_{\text{dementia}} - 0.3813 \times I_{\text{malignancy}} - 0.6538 \times I_{\text{HIV/AIDS}} - 0.2217 \times I_{\text{depression}} + 0.0154 \times \text{BMI} - 0.0018 \times \text{systolic blood pressure} + 0.0530 \times \text{log-income} - 0.0804 \times I_{\text{marital status}} + 0.0554 \times I_{\text{service connectedness}} + 0.1598 \times I_{\text{housing stress}} + 0.0298 \times I_{\text{low education}} - 0.0920 \times I_{\text{low employment}} - 0.0866 \times I_{\text{persistent poverty}} + 0.6077 \times I_{\text{methotrexate}} - 0.1684 \times I_{\text{hydroxychloroquine}} + 0.3387 \times I_{\text{sulfasalazine}} + 0.4173 \times I_{\text{other non-biologic DMARDs}} + 0.0807 \times I_{\text{NSAIDs}} + 0.4756 \times I_{\text{glucocorticoids}} - 0.0687 \times I_{\text{statin}} - 0.0073 \times I_{\text{RASi}} + 0.0118 \times \text{serum albumin} + 0.2549 \times \text{number of articular procedures per year}$$

*Note:* “I\_” represents indicator variables taking value 0 or 1 depending on the absence or presence of the respective trait.

Example for a 65 year old white married male with eGFR of 90 mL/min/1.73m<sup>2</sup>, BMI of 29, systolic blood pressure of 140 mmHg, serum albumin of 3.2 g/dL, two articular procedures per year, log-income of 10.8 (USD 50,000) and using NSAIDs at baseline:

$$a = 0.5969 - 0.0530 \times 65 (\text{age}) + 0.0077 \times 90 (\text{eGFR}) + 0.0154 \times 29 (\text{BMI}) - 0.0018 \times 140 (\text{systolic blood pressure}) + 0.0530 \times 10.8 (\text{log-income}) + 0.0807 \times 1 (I_{\text{NSAIDs}}) + 0.0118 \times 3.2 (\text{serum albumin}) + 0.2549 \times 2 (\text{number of articular procedures per year}) = -0.75984$$

which gives Prob(biologic use) =  $\exp(-0.75984)/(1+\exp[-0.75984]) = 0.32$ .

Abbreviations: AIDS = acquired immunodeficiency syndrome; BMI = body mass index; DMARD = disease-modifying anti-rheumatic drug; eGFR = estimated glomerular filtration rate; HIV = human immunodeficiency virus; NSAID = nonsteroidal anti-inflammatory drug; RASi = renin-angiotensin system inhibitor.

**Supplemental Table 4. Association of biologic treatment with incident CKD (decrease in eGFR [A] <60 and [B] <45 mL/min/1.73m<sup>2</sup>) in the overall cohort**

|                                        | Decrease in eGFR (mL/min/1.73m <sup>2</sup> ) |                  |
|----------------------------------------|-----------------------------------------------|------------------|
|                                        | HR (95% CI)                                   |                  |
|                                        | [A] <60                                       | [B] <45          |
| Treated (vs. untreated) with biologics | 0.83 (0.72-0.96)                              | 0.42 (0.32-0.56) |

Estimates were calculated using time-dependent Cox models.

Data are adjusted for fixed (age, sex, race, prevalent comorbidities [diabetes mellitus, hypertension, coronary heart disease, congestive heart failure, cerebrovascular disease, peripheral vascular disease, chronic lung disease, liver disease, dementia, malignancy, depression, and HIV/AIDS], and socioeconomic parameters [mean per capita income, marital status, service connectedness, housing stress, low education, low employment, and persistent poverty]) and time-dependent covariates (eGFR, BMI, systolic blood pressure, serum albumin, number of articular procedures per year, and medications [statins, RASi, methotrexate, hydroxychloroquine, sulfasalazine, leflunomide, other non-biologic DMARDs, NSAIDs, and glucocorticoids]).

Abbreviations: AIDS = acquired immunodeficiency syndrome; BMI = body mass index; CI = confidence interval; DMARD = disease-modifying anti-rheumatic drug; eGFR = estimated glomerular filtration rate; HIV = human immunodeficiency virus; HR = hazard ratio; NSAID = nonsteroidal anti-inflammatory drug; RASi = renin-angiotensin system inhibitor.

**Supplemental Table 5. Association of biologic treatment with change in eGFR in the overall cohort**

|                                        | Change in eGFR (mL/min/1.73m <sup>2</sup> /year) |                          |                  |
|----------------------------------------|--------------------------------------------------|--------------------------|------------------|
|                                        | <-3                                              | MOR (95% CI)<br>-3 to <0 | ≥0               |
| Treated (vs. untreated) with biologics | 0.82 (0.72-0.95)                                 | 1 [reference]            | 1.03 (0.95-1.12) |

Estimates were calculated using multinomial logistic regression models.

Data are adjusted for fixed (age, sex, race, prevalent comorbidities [diabetes mellitus, hypertension, coronary heart disease, congestive heart failure, cerebrovascular disease, peripheral vascular disease, chronic lung disease, liver disease, dementia, malignancy, depression, and HIV/AIDS], and socioeconomic parameters [mean per capita income, marital status, service connectedness, housing stress, low education, low employment, and persistent poverty]) and time-dependent covariates (eGFR, BMI, systolic blood pressure, serum albumin, number of articular procedures per year, and medications [statins, RASi, methotrexate, hydroxychloroquine, sulfasalazine, leflunomide, other non-biologic DMARDs, NSAIDs, and glucocorticoids]).

Abbreviations: AIDS = acquired immunodeficiency syndrome; BMI = body mass index; CI = confidence interval; DMARD = disease-modifying anti-rheumatic drug; eGFR = estimated glomerular filtration rate; HIV = human immunodeficiency virus; MOR = multinomial odds ratio; NSAID = nonsteroidal anti-inflammatory drug; RASi = renin-angiotensin system inhibitor.



**Supplemental Table 6. ICD-9 and procedure (CPT) codes used to define prevalent comorbid conditions and RA-related articular procedures**

| <b>Comorbid condition</b>                                                                  | <b>ICD-9 code</b>                                                                                                                                                                                                                                                                                                                                                                                                                                                                                                                                                                                                                                                                                                                                           |
|--------------------------------------------------------------------------------------------|-------------------------------------------------------------------------------------------------------------------------------------------------------------------------------------------------------------------------------------------------------------------------------------------------------------------------------------------------------------------------------------------------------------------------------------------------------------------------------------------------------------------------------------------------------------------------------------------------------------------------------------------------------------------------------------------------------------------------------------------------------------|
| Rheumatoid arthritis                                                                       | 714.0                                                                                                                                                                                                                                                                                                                                                                                                                                                                                                                                                                                                                                                                                                                                                       |
| Hypertension                                                                               | 401-405                                                                                                                                                                                                                                                                                                                                                                                                                                                                                                                                                                                                                                                                                                                                                     |
| Diabetes mellitus                                                                          | 250.x                                                                                                                                                                                                                                                                                                                                                                                                                                                                                                                                                                                                                                                                                                                                                       |
| Coronary artery disease                                                                    | 414.0, 414.8, 414.9                                                                                                                                                                                                                                                                                                                                                                                                                                                                                                                                                                                                                                                                                                                                         |
| Angina                                                                                     | 411, 413                                                                                                                                                                                                                                                                                                                                                                                                                                                                                                                                                                                                                                                                                                                                                    |
| Myocardial infarction                                                                      | 410-410.9, 412                                                                                                                                                                                                                                                                                                                                                                                                                                                                                                                                                                                                                                                                                                                                              |
| PCI                                                                                        | 36.03, 36.04, 36.06, 36.07, 36.09                                                                                                                                                                                                                                                                                                                                                                                                                                                                                                                                                                                                                                                                                                                           |
| CABG                                                                                       | 36.10-36.17, 36.19                                                                                                                                                                                                                                                                                                                                                                                                                                                                                                                                                                                                                                                                                                                                          |
| Congestive heart failure                                                                   | 428-428.9                                                                                                                                                                                                                                                                                                                                                                                                                                                                                                                                                                                                                                                                                                                                                   |
| Cerebrovascular disease                                                                    | 430-438                                                                                                                                                                                                                                                                                                                                                                                                                                                                                                                                                                                                                                                                                                                                                     |
| Peripheral arterial disease                                                                | 440.0-440.9, 443, 443.x, 38.0, 38.1, 39.50, 39.22, 39.24, 39.25, 39.26, 39.28                                                                                                                                                                                                                                                                                                                                                                                                                                                                                                                                                                                                                                                                               |
| Chronic lung disease                                                                       | 490-496, 500-505, 506.4                                                                                                                                                                                                                                                                                                                                                                                                                                                                                                                                                                                                                                                                                                                                     |
| Dementia                                                                                   | 290-290.9                                                                                                                                                                                                                                                                                                                                                                                                                                                                                                                                                                                                                                                                                                                                                   |
| Liver disease                                                                              | 571.x, 572.x, 456.0-456.21                                                                                                                                                                                                                                                                                                                                                                                                                                                                                                                                                                                                                                                                                                                                  |
| Malignancy                                                                                 | 140-172.9, 174-195.8, 200-208.9, 196-199.1                                                                                                                                                                                                                                                                                                                                                                                                                                                                                                                                                                                                                                                                                                                  |
| HIV/AIDS                                                                                   | 042, V08, 795.71                                                                                                                                                                                                                                                                                                                                                                                                                                                                                                                                                                                                                                                                                                                                            |
| Depression                                                                                 | 296.x                                                                                                                                                                                                                                                                                                                                                                                                                                                                                                                                                                                                                                                                                                                                                       |
| <b>CPT codes used to define coronary interventions and RA-related articular procedures</b> |                                                                                                                                                                                                                                                                                                                                                                                                                                                                                                                                                                                                                                                                                                                                                             |
| <b>Procedure</b>                                                                           | <b>CPT code</b>                                                                                                                                                                                                                                                                                                                                                                                                                                                                                                                                                                                                                                                                                                                                             |
| PCI                                                                                        | 92980 92981 92982 92984 92985 92986 92987 92988 92989<br>92990 92991 92992 92993 92994 92995 92996                                                                                                                                                                                                                                                                                                                                                                                                                                                                                                                                                                                                                                                          |
| CABG                                                                                       | 33510 33511 33512 33513 33514 33515 33516 33517 33518<br>33519 33521 33522 33523 33533 33534 33535 33536<br>22532 22533 22534 22548 22554 22556 22558 22585 22590<br>22595 22600 22610 22612 22614 22630 22632 22800 22802<br>22804 22808 22810 22812 23470 23472 23800 23802 24360<br>24361 24362 24363 24365 24366 24800 24802 25332 25441<br>25442 25443 25444 25445 25446 25447 25800 25805 25810<br>25820 25825 25830 26131 26135 26140 26145 26530 26531<br>26535 26536 26820 26841 26842 26843 26844 26850 26852<br>26860 26861 26862 26863 27130 27280 27282 27284 27286<br>27334 27437 27438 27440 27441 27442 27443 27445 27446<br>27447 27580 27700 27702 27703 27870 27871 28270 28272<br>28292 28293 28294 28296 28297 28298 28299 28705 28715 |
| RA-related articular procedures                                                            |                                                                                                                                                                                                                                                                                                                                                                                                                                                                                                                                                                                                                                                                                                                                                             |

28725 28730 28735 28737 28740 28750 28755 28760 29899  
20551 20552 20553 20600 20605 20610

---

Abbreviations: AIDS = acquired immunodeficiency syndrome; CABG = coronary artery bypass grafting; CPT = Current Procedural Terminology; HIV = human immunodeficiency virus; ICD = International Classification of Diseases; PCI = percutaneous coronary intervention; RA = rheumatoid arthritis

**Supplemental Table 7. Area-based socio-economic indicators**

The Area Health Resources Files (AHRF, <http://ahrf.hrsa.gov/>) system is issued by the National Center for Health Workforce Analysis, Bureau of Health Workforce, Health Resources and Services Administration.

Within the AHRF, we used select **2004 County Typology Codes** from the Economic Research Service (ERS), U.S. Department of Agriculture, [www.ers.usda.gov](http://www.ers.usda.gov). The 2004 County Typology Codes were developed for all 3,141 counties, county equivalents, and independent cities in the United States.

| <b>Indicators</b>  | <b>Definition</b>                                                                                                                                                                                                                       |
|--------------------|-----------------------------------------------------------------------------------------------------------------------------------------------------------------------------------------------------------------------------------------|
| Housing stress     | 30 percent or more of households had one or more of these housing conditions in 2000: lacked complete plumbing, lacked complete kitchen, paid 30 percent or more of income for owner costs or rent, or had more than 1 person per room. |
| Low-education      | 25 percent or more of residents 25 through 64 years old had neither a high school diploma nor GED in 2000.                                                                                                                              |
| Low-employment     | Less than 65 percent of residents 21 through 64 years old were employed in 2000.                                                                                                                                                        |
| Persistent poverty | 20 percent or more of residents were poor as measured by each of the last 4 censuses: 1970, 1980, 1990 and 2000.                                                                                                                        |

**Supplemental Figure 1. Kaplan-Meier curve for initiation of biologics in the overall cohort**

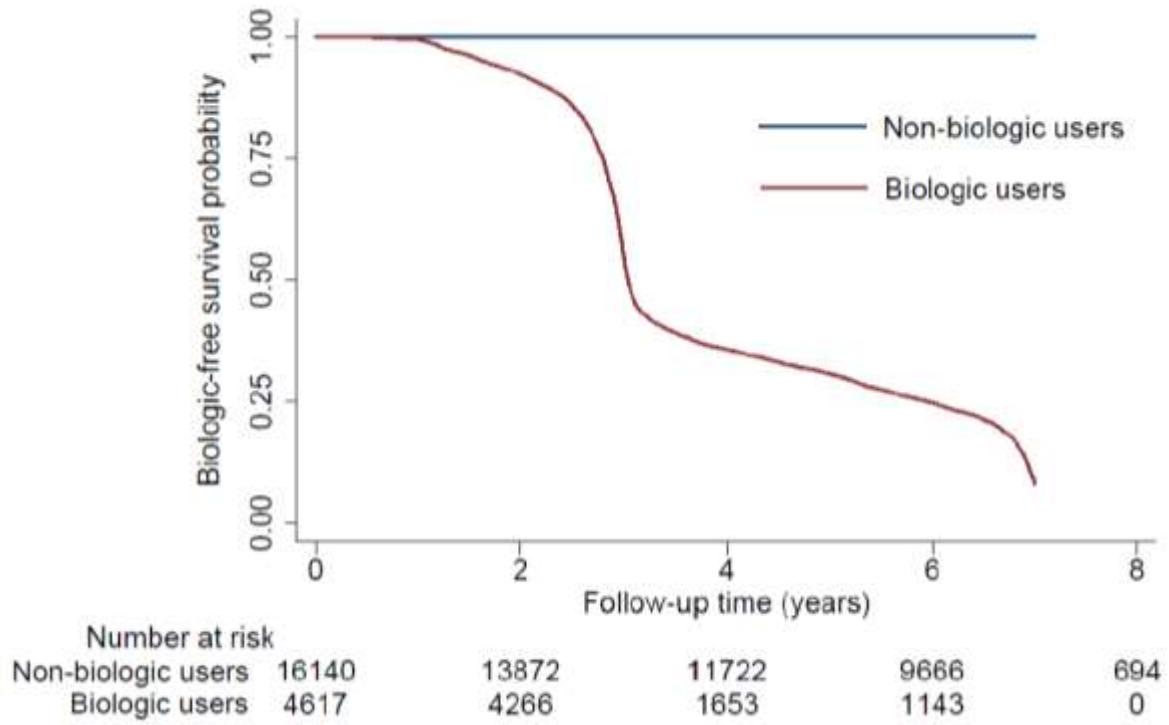

**Supplemental Figure 2. Change in eGFR slopes (mean, SD) before and after biologic administration in patients treated with biologics in the overall cohort**

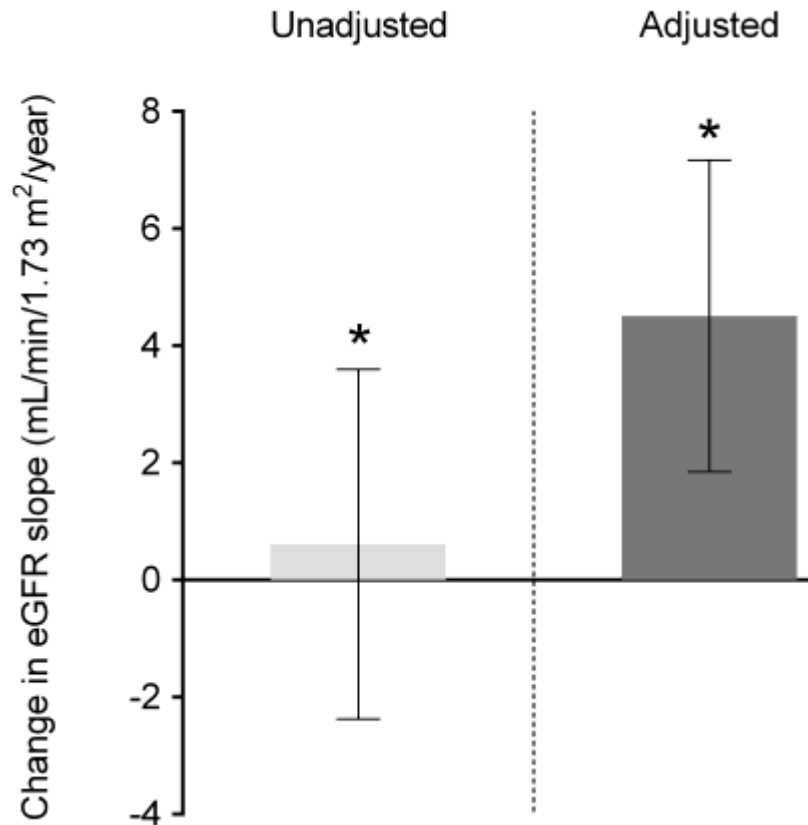

\* $P < 0.001$  for comparing differences between pre- and post-biologic administration. Slopes were estimated from unadjusted (left bar) and multivariable-adjusted (right bar) mixed-effects models. Models were adjusted for fixed (age, sex, race, comorbidities [diabetes mellitus, hypertension, coronary heart disease, congestive heart failure, cerebrovascular disease, peripheral vascular disease, chronic lung disease, liver disease, dementia, malignancy, depression, and HIV/AIDS], and socioeconomic parameters [mean per capita income, marital status, service connectedness, housing stress, low education, low employment, and persistent poverty]) and time-dependent confounders (eGFR, BMI, systolic blood pressure, serum albumin, number of articular procedures per year, and medications [statins, RASi, methotrexate, hydroxychloroquine, sulfasalazine, leflunomide, other non-biologic DMARDs, NSAIDs, and glucocorticoids]).

Abbreviations: AIDS = acquired immunodeficiency syndrome; BMI = body mass index; DMARD = disease-modifying anti-rheumatic drug; eGFR = estimated glomerular filtration rate; HIV = human immunodeficiency virus; NSAID = nonsteroidal anti-inflammatory drug; RASi = renin-angiotensin system inhibitor; SD = standard deviation.

**Supplemental Figure 3. Change in eGFR slopes (mean, SD) before and after biologic administration in patients treated with (A) TNF- $\alpha$  inhibitors and (B) non-TNF biologics in the overall cohort**

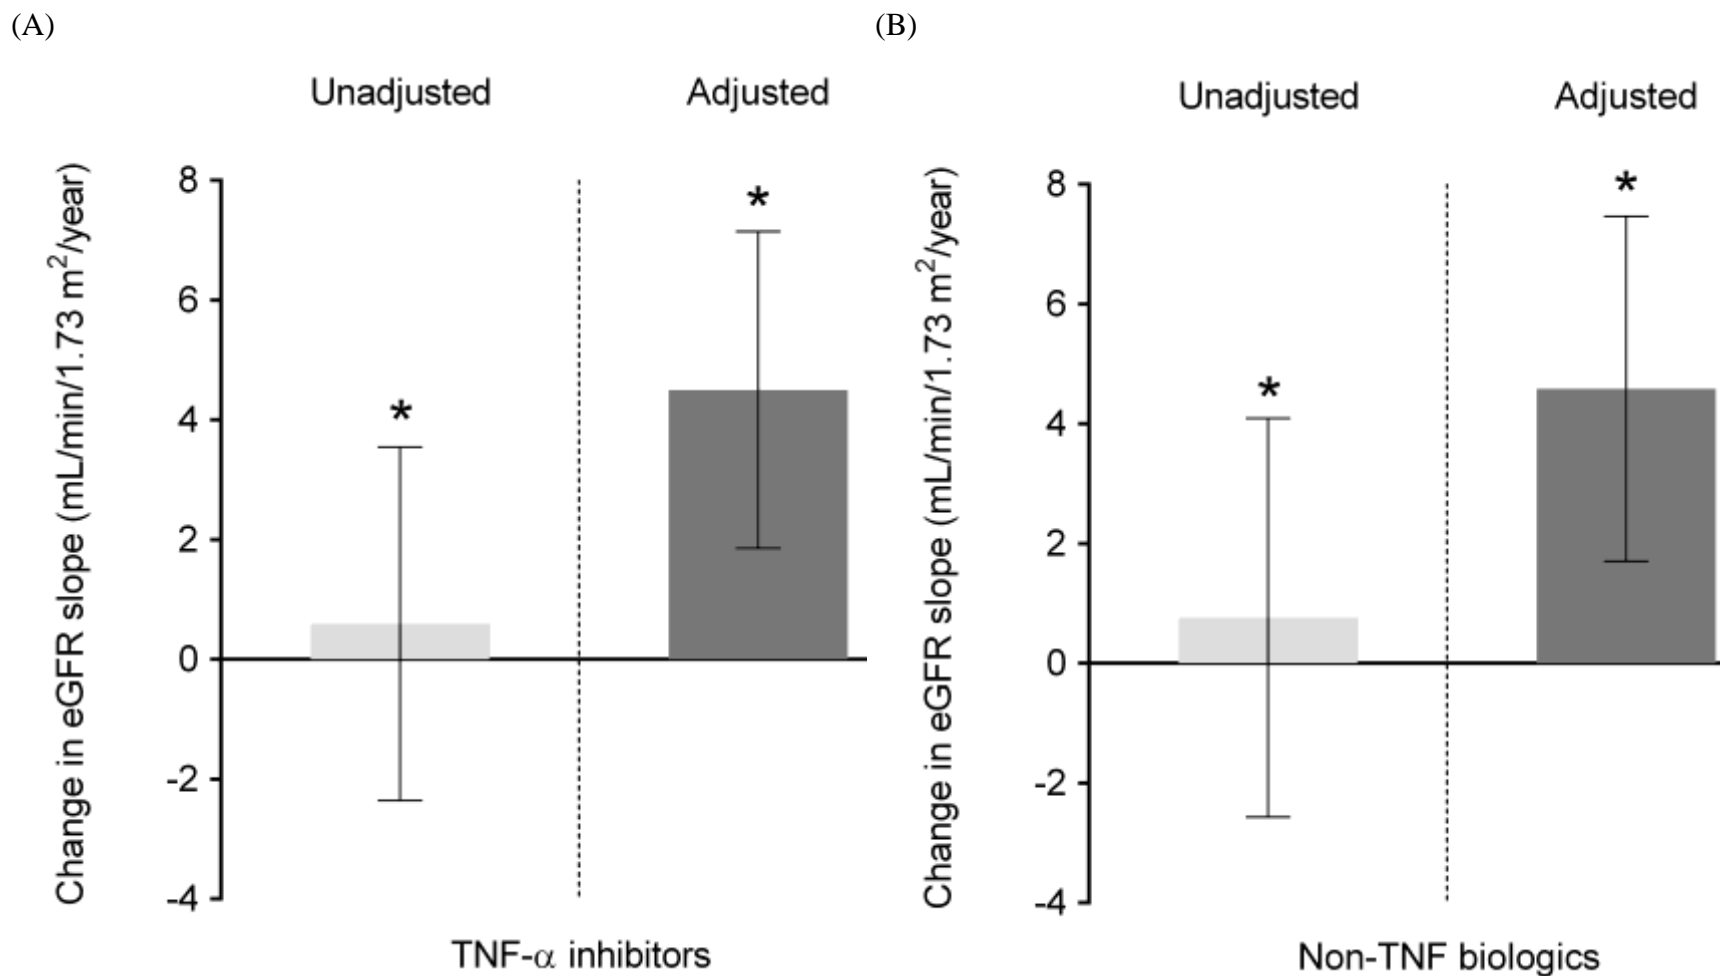

\* $P < 0.001$  for comparing differences between pre- and post-biologic administration.

Slopes were estimated from unadjusted (left bar) and multivariable-adjusted (right bar) mixed-effects models. Models were adjusted for fixed (age, sex, race, comorbidities [diabetes mellitus, hypertension, coronary heart disease, congestive heart failure,

cerebrovascular disease, peripheral vascular disease, chronic lung disease, liver disease, dementia, malignancy, depression, and HIV/AIDS], and socioeconomic parameters [mean per capita income, marital status, service connectedness, housing stress, low education, low employment, and persistent poverty]) and time-dependent confounders (eGFR, BMI, systolic blood pressure, serum albumin, number of articular procedures per year, and medications [statins, RASi, methotrexate, hydroxychloroquine, sulfasalazine, leflunomide, other non-biologic DMARDs, NSAIDs, and glucocorticoids]).

Abbreviations: AIDS = acquired immunodeficiency syndrome; BMI = body mass index; DMARD = disease-modifying anti-rheumatic drug; eGFR = estimated glomerular filtration rate; HIV = human immunodeficiency virus; NSAID = nonsteroidal anti-inflammatory drug; RASi = renin-angiotensin system inhibitor; SD = standard deviation.

**Supplemental Figure 4. Algorithm used to define study cohort**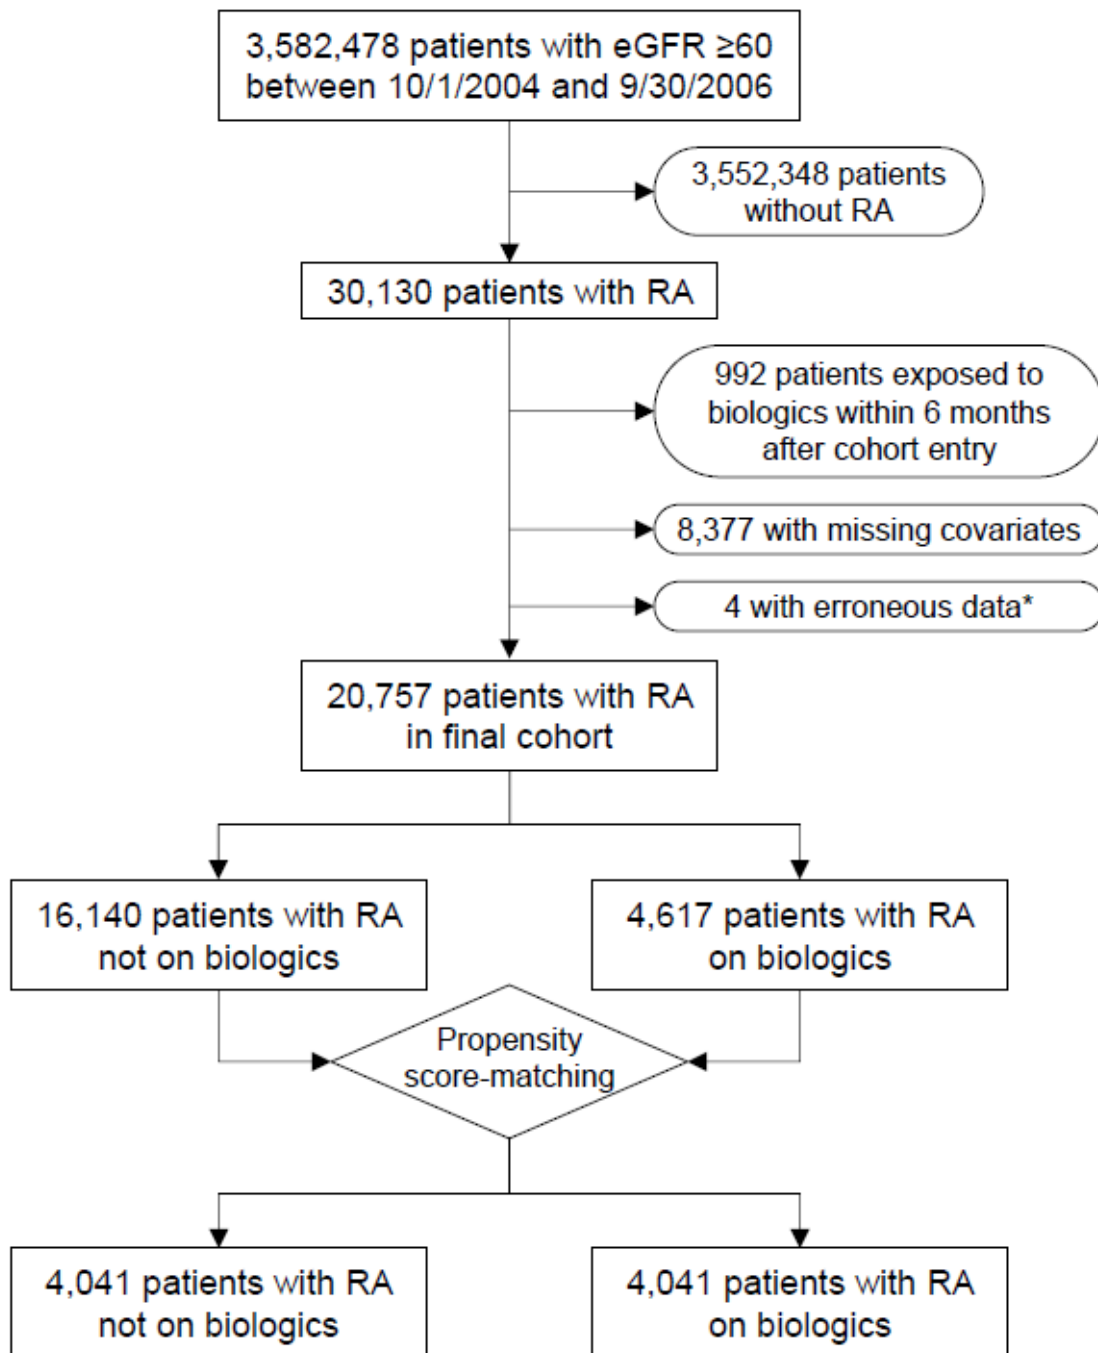

\*Patients with the date of start of follow-up later than the date of last encounter.

Abbreviations: eGFR = estimated glomerular filtration rate; RA = rheumatoid arthritis.
